# Supplementary material for: Effects of vegetation restoration on soil quality in fragile karst ecosystems of southwest China
Source: PeerJ. 2020 Jul 2;8:e9456. doi: 10.7717/peerj.9456 (PMC7335502; doi:10.7717/peerj.9456)
Supplement: Supplemental Information 1 [file peerj-08-9456-s001.xlsx]

## Sheet: SOC
sites	0~10	10~20	20~30	0~30	ck	0~10	10~20	20~30	0~30	ck average	0~10	10~20	20~30	0~30	Variation	0~10	10~20	20~30	0~30	variation ratio	0~30
forest reserve	12.5282	18.492	21.556	17.5254	CK1	21.102	15.8808	7.2246	14.7358		20.0742	16.1115	8.86574	15.0172		-7.54595	2.38052	12.6903	2.50827		16.7027
	34.6491	21.945	18.3911	24.9951		20.3803	14.5938	7.1732	14.0491		20.0742	16.1115	8.86574	15.0172		14.5749	5.83351	9.52534	9.9779		66.4434
	22.4544	22.7129	23.877	23.0148		18.7404	17.8599	12.1994	16.2666		20.0742	16.1115	8.86574	15.0172		2.38017	6.60141	15.0113	7.9976		53.2565
natural shrubland	29.7023	26.7928	24.9403	27.1451	CK2	15.6051	13.6313	12.0506	13.7623		15.984	14.3333	12.6782	14.3318		13.7183	12.4595	12.2621	12.8133		89.4045
	22.935	19.3396	31.178	24.4842		14.7641	12.4916	11.8085	13.0214		15.984	14.3333	12.6782	14.3318		6.95097	5.00629	18.4998	10.1524		70.8378
	23.5369	22.332	19.4939	21.7876		17.5827	16.877	14.1755	16.2117		15.984	14.3333	12.6782	14.3318		7.55288	7.99871	6.81565	7.45575		52.0224
eucalyptus	28.6807	16.2094	10.8975	18.5959	CK3	9.88935	8.23777	9.24047	9.12253		9.88935	8.23777	9.24047	9.12253		18.7914	7.97162	1.65702	9.47333		103.845
	12.1096	17.0969	12.5952	13.9339		9.88935	8.23777	9.24047	9.12253		9.88935	8.23777	9.24047	9.12253		2.22023	8.85918	3.35475	4.81138		52.7418
	10.6477	8.24714	7.35951	8.75146		9.88935	8.23777	9.24047	9.12253		9.88935	8.23777	9.24047	9.12253		0.758398	0.0093703	-1.88097	-0.371066		-4.06758
	15.4522	3.836	10.6303	9.97283		9.88935	8.23777	9.24047	9.12253		9.88935	8.23777	9.24047	9.12253		5.56285	-4.40177	1.3898	0.850295		9.32082
plum	13.5295	7.96499	5.62433	9.03962	CK4	8.89548	7.51142	6.62624	7.67771		16.4544	10.3886	7.91029	11.5844		-2.92486	-2.42362	-2.28597	-2.54481		-21.9675
	10.3084	8.69558	7.03796	8.68063		18.0587	11.2112	8.66166	12.6439		16.4544	10.3886	7.91029	11.5844		-6.14604	-1.69303	-0.872337	-2.9038		-25.0664
	11.68	8.66543	7.73071	9.35871		22.409	12.4432	8.44297	14.4317		16.4544	10.3886	7.91029	11.5844		-4.77442	-1.72318	-0.179585	-2.22572		-19.2131
zenia insignis	19.0699	16.8474	13.1502	16.3558	CK5	21.102	15.8808	7.2246	14.7358		20.0742	16.1115	8.86574	15.0172		-1.00426	0.735876	4.28449	1.33869		8.91441
	34.0362	19.2743	16.8781	23.3962		20.3803	14.5938	7.1732	14.0491		20.0742	16.1115	8.86574	15.0172		13.962	3.16278	8.01239	8.37904		55.7965
	44.0532	21.5727	14.56	26.7287		18.7404	17.8599	12.1994	16.2666		20.0742	16.1115	8.86574	15.0172		23.979	5.46126	5.69426	11.7115		77.9875
juglans regia-crop	18.4758	15.0487	7.53794	13.6875	CK6	16.0688	7.82069	5.05793	9.64913		13.1897	11.3577	7.26164	10.603		5.28612	3.69102	0.276303	3.08448		29.0905
	17.28	11.9265	6.6879	11.9648		9.21104	11.5208	6.89537	9.20908		13.1897	11.3577	7.26164	10.603		4.09029	0.568747	-0.573738	1.36176		12.8432
	15.7949	14.6128	13.0934	14.5004		14.2893	14.7316	9.83162	12.9509		13.1897	11.3577	7.26164	10.603		2.60523	3.25504	5.83177	3.89734		36.7569
toona sinensis-napier grass	48.362	46.7965	28.5232	41.2272	CK7	17.6274	12.8443	21.4874	17.3197		19.0912	12.9294	14.1976	15.406		29.2708	33.8672	14.3257	25.8212		167.605
	43.2353	32.0235	29.597	34.9519		19.3822	13.5176	9.91576	14.2718		19.0912	12.9294	14.1976	15.406		24.1441	19.0941	15.3994	19.5459		126.872
	26.4182	16.1854	30.4202	24.3413		20.264	12.4261	11.1895	14.6265		19.0912	12.9294	14.1976	15.406		7.32701	3.25606	16.2227	8.93526		57.9984

## Sheet: TN
sites	0~10	10~20	20~30	0~30	ck	0~10	10~20	20~30	0~30	ck average	0~10	10~20	20~30	0~30	Variation	0~10	10~20	20~30	0~30	variation ratio	0~30
forest reserve	0.2372	0.2861	0.2923	0.271867	CK1	0.2707	0.2115	0.1645	0.215567		0.2472	0.2117	0.1636	0.2075		-0.01	0.0744	0.1287	0.0643667		31.0201
	0.4037	0.3108	0.285	0.333167		0.2426	0.206	0.1603	0.202967		0.2472	0.2117	0.1636	0.2075		0.1565	0.0991	0.1214	0.125667		60.5622
	0.3054	0.3138	0.2996	0.306267		0.2284	0.2175	0.1661	0.204		0.2472	0.2117	0.1636	0.2075		0.0582	0.1021	0.136	0.0987667		47.5984
natural shrubland	0.3119	0.3037	0.2618	0.292467	CK2	0.1798	0.1613	0.1457	0.162267		0.1729	0.1548	0.1483	0.1587		0.139	0.1489	0.1135	0.133767		84.289
	0.2695	0.2257	0.3019	0.2657		0.1776	0.1517	0.1428	0.157367		0.1729	0.1548	0.1483	0.1587		0.0966	0.0709	0.1536	0.107		67.4228
	0.2634	0.2779	0.2249	0.2554		0.1613	0.1513	0.1564	0.156333		0.1729	0.1548	0.1483	0.1587		0.0905	0.1231	0.0766	0.0967		60.9326
eucalyptus	0.2566	0.1744	0.1331	0.188033	CK3	0.1276	0.1313	0.1292	0.129367		0.1276	0.1313	0.1292	0.1294		0.129	0.0431	0.0039	0.0586333		45.3117
	0.1949	0.1535	0.1476	0.165333		0.1276	0.1313	0.1292	0.129367		0.1276	0.1313	0.1292	0.1294		0.0673	0.0222	0.0184	0.0359333		27.7692
	0.2107	0.1417	0.1442	0.165533		0.1276	0.1313	0.1292	0.129367		0.1276	0.1313	0.1292	0.1294		0.0831	0.0104	0.015	0.0361333		27.9238
	0.1911	0.1274	0.1591	0.1592		0.1276	0.1313	0.1292	0.129367		0.1276	0.1313	0.1292	0.1294		0.0635	-0.0039	0.0299	0.0298		23.0294
plum	0.1331	0.0913	0.0712	0.0985333	CK4	0.1172	0.1146	0.1167	0.116167		0.1699	0.135	0.1273	0.1441		-0.0368	-0.0437	-0.0561	-0.0455667		-31.6216
	0.1171	0.0962	0.0842	0.0991667		0.188	0.1474	0.1272	0.1542		0.1699	0.135	0.1273	0.1441		-0.0528	-0.0388	-0.0431	-0.0449333		-31.182
	0.1279	0.1025	0.11	0.113467		0.2044	0.143	0.1381	0.161833		0.1699	0.135	0.1273	0.1441		-0.042	-0.0325	-0.0173	-0.0306333		-21.2584
zenia insignis	0.2649	0.2576	0.2434	0.2553	CK5	0.2707	0.2115	0.1645	0.215567		0.2472	0.2117	0.1636	0.2075		0.0177	0.0459	0.0798	0.0478		23.0361
	0.3966	0.2724	0.2503	0.306433		0.2426	0.206	0.1603	0.202967		0.2472	0.2117	0.1636	0.2075		0.1494	0.0607	0.0867	0.0989333		47.6787
	0.4882	0.3027	0.24685	0.345917		0.2284	0.2175	0.1661	0.204		0.2472	0.2117	0.1636	0.2075		0.241	0.091	0.08325	0.138417		66.7068
juglans regia-crop	0.1998	0.1614	0.116	0.159067	CK6	0.1914	0.1409	0.1331	0.155133		0.2005	0.1768	0.1411	0.1728		-0.0007	-0.0154	-0.0251	-0.0137333		-7.94753
	0.1896	0.1468	0.0916	0.142667		0.2084	0.1874	0.1331	0.1763		0.2005	0.1768	0.1411	0.1728		-0.0109	-0.03	-0.0495	-0.0301333		-17.4383
	0.1858	0.1672	0.1386	0.163867		0.2016	0.2022	0.157	0.186933		0.2005	0.1768	0.1411	0.1728		-0.0147	-0.0096	-0.0025	-0.00893333		-5.16975
toona sinensis-napier grass	0.4502	0.43	0.293	0.391067	CK7	0.2485	0.2267	0.1891	0.221433		0.2513	0.2093	0.1747	0.2117		0.1989	0.2207	0.1183	0.179367		84.7268
	0.4242	0.335	0.3139	0.3577		0.2584	0.1952	0.1652	0.206267		0.2513	0.2093	0.1747	0.2117		0.1729	0.1257	0.1392	0.146		68.9655
	0.3692	0.2975	0.2686	0.311767		0.2469	0.2059	0.1697	0.2075		0.2513	0.2093	0.1747	0.2117		0.1179	0.0882	0.0939	0.100067		47.2681

## Sheet: CN ratio
sites	0~10	10~20	20~30	0~30	ck	0~10	10~20	20~30	0~30	ck average	0~10	10~20	20~30	0~30	Variation	0~10	10~20	20~30	0~30	variation ratio	0~30
forest reserve	5.28172	6.46347	7.37462	6.44633	CK1	7.79535	7.50865	4.39186	6.56528		8.12063	7.61053	5.41916	7.23718		-2.83891	-1.14705	1.95546	-0.790853
	8.58288	7.06081	6.45301	7.50227		8.40078	7.08435	4.47486	6.65333		8.12063	7.61053	5.41916	7.23718		0.462247	-0.549717	1.03386	0.265085
	7.35245	7.23802	7.96963	7.51461		8.20508	8.21144	7.34462	7.92038		8.12063	7.61053	5.41916	7.23718		-0.768186	-0.37251	2.55047	0.277431
natural shrubland	9.52303	8.82211	9.52647	9.28144	CK2	8.67913	8.45091	8.27085	8.46696		9.24465	9.25923	8.54902	9.03077		0.278375	-0.43712	0.977441	0.250674
	8.51019	8.56871	10.3273	9.21497		8.31313	8.23438	8.26927	8.27226		9.24465	9.25923	8.54902	9.03077		-0.734458	-0.690521	1.77823	0.184204
	8.93579	8.03598	8.66779	8.53077		10.9006	11.1547	9.0636	10.373		9.24465	9.25923	8.54902	9.03077		-0.308856	-1.22325	0.118764	-0.499998
eucalyptus	11.1772	9.29438	8.18745	9.88966	CK3	7.75028	6.27401	7.15207	7.05878		7.75028	6.27401	7.15207	7.04987		3.42693	3.02037	1.03538	2.83979
	6.21323	11.1381	8.53335	8.42777		7.75028	6.27401	7.15207	7.05878		7.75028	6.27401	7.15207	7.04987		-1.53705	4.86407	1.38128	1.3779
	5.05351	5.82014	5.10368	5.28683		7.75028	6.27401	7.15207	7.05878		7.75028	6.27401	7.15207	7.04987		-2.69676	-0.453865	-2.04839	-1.76304
	8.08592	3.01099	6.68151	6.26434		7.75028	6.27401	7.15207	7.05878		7.75028	6.27401	7.15207	7.04987		0.335649	-3.26302	-0.470563	-0.785532
plum	10.1649	8.72398	7.89933	9.17417	CK4	7.59	6.55447	5.67801	6.60749		9.68476	7.69527	6.2139	8.03916		0.480185	1.02871	1.68543	1.13501
	8.80304	9.03906	8.35862	8.75358		9.60569	7.60598	6.80948	8.00705		9.68476	7.69527	6.2139	8.03916		-0.881716	1.3438	2.14472	0.714418
	9.13212	8.45408	7.02792	8.24798		10.9633	8.70154	6.11367	8.59284		9.68476	7.69527	6.2139	8.03916		-0.552635	0.758812	0.814018	0.208818
zenia insignis	7.19892	6.54012	5.40272	6.40652	CK5	7.79535	7.50865	4.39186	6.56528		8.12063	7.61053	5.41916	7.23718		-0.921711	-1.0704	-0.0164331	-0.830663
	8.58199	7.07572	6.74316	7.635		8.40078	7.08435	4.47486	6.65333		8.12063	7.61053	5.41916	7.23718		0.461363	-0.534805	1.324	0.397821
	9.0236	7.12677	5.89832	7.72691		8.20508	8.21144	7.34462	7.92038		8.12063	7.61053	5.41916	7.23718		0.902973	-0.483753	0.479163	0.489726
juglans regia-crop	9.24716	9.32388	6.49823	8.60488	CK6	8.39538	5.55053	3.8001	5.91534		6.5784	6.42405	5.14645	6.13601		2.66875	2.89983	1.35178	2.46887
	9.11392	8.1243	7.3012	8.38653		4.41988	6.14773	5.18059	5.2494		6.5784	6.42405	5.14645	6.13601		2.53551	1.70025	2.15475	2.25052
	8.50104	8.73969	9.4469	8.84888		7.08796	7.28568	6.26218	6.87861		6.5784	6.42405	5.14645	6.13601		1.92263	2.31564	4.30045	2.71287
toona sinensis-napier grass	10.7423	10.8829	9.73489	10.5423	CK7	7.09351	5.66579	11.363	8.04076		7.59698	6.17743	8.12682	7.27729		3.14536	4.70549	1.60806	3.26496
	10.1922	9.55924	9.4288	9.7713		7.50083	6.925	6.00228	6.80937		7.59698	6.17743	8.12682	7.27729		2.59523	3.38181	1.30197	2.494
	7.15553	5.44048	11.3255	7.80753		8.20737	6.03502	6.59371	6.94537		7.59698	6.17743	8.12682	7.27729		-0.441449	-0.736951	3.19866	0.530241

## Sheet: TP
sites	0~10	10~20	20~30	0~30	ck	0~10	10~20	20~30	0~30	ck average	0~10	10~20	20~30	0~30	Variation	0~10	10~20	20~30	0~30	variation ratio	0~30
forest reserve	0.5236	0.671	0.67385	0.622817	CK1	1.698	1.443	0.9633	1.3681		1.711	1.4137	1.1174	1.414		-1.1874	-0.7427	-0.44355	-0.791183		-55.9536
	0.7862	0.72	0.6772	0.7278		1.77	1.347	1.047	1.388		1.711	1.4137	1.1174	1.414		-0.9248	-0.6937	-0.4402	-0.6862		-48.529
	0.6377	0.6527	0.6705	0.653633		1.665	1.451	1.342	1.486		1.711	1.4137	1.1174	1.414		-1.0733	-0.761	-0.4469	-0.760367		-53.7742
natural shrubland	1.447	1.348	1.377	1.39067	CK2	1.272	1.173	1.104	1.183		1.2587	1.2393	1.1567	1.2182		0.1883	0.1087	0.2203	0.172467		14.1575
	1.342	1.227	1.511	1.36		1.155	1.349	1.196	1.23333		1.2587	1.2393	1.1567	1.2182		0.0833	-0.0123	0.3543	0.1418		11.6401
	1.513	1.575	1.212	1.43333		1.349	1.196	1.17	1.23833		1.2587	1.2393	1.1567	1.2182		0.2543	0.3357	0.0553	0.215133		17.6599
eucalyptus	0.25282	0.18942	0.16742	0.20322	CK3	0.49602	0.48382	0.58552	0.521787		0.49602	0.48382	0.58552	0.521787		-0.2432	-0.2944	-0.4181	-0.318567		-61.053
	0.6072	0.5405	0.54	0.562567		0.49602	0.48382	0.58552	0.521787		0.49602	0.48382	0.58552	0.521787		0.11118	0.05668	-0.04552	0.04078		7.81545
	0.5687	0.5234	0.4875	0.526533		0.49602	0.48382	0.58552	0.521787		0.49602	0.48382	0.58552	0.521787		0.07268	0.03958	-0.09802	0.00474667		0.909695
	0.5575	0.5225	0.5097	0.5299		0.49602	0.48382	0.58552	0.521787		0.49602	0.48382	0.58552	0.521787		0.06148	0.03868	-0.07582	0.00811333		1.55491
plum	0.38562	0.27532	0.30672	0.322553	CK4	0.29462	0.28302	0.32892	0.302187		0.5531	0.3184	0.2913	0.3876		-0.16748	-0.04308	0.01542	-0.0650467		-16.7819
	0.34232	0.31482	0.22652	0.294553		0.90642	0.3513	0.264	0.50724		0.5531	0.3184	0.2913	0.3876		-0.21078	-0.00358	-0.06478	-0.0930467		-24.0058
	0.29802	0.23402	0.25392	0.261987		0.4582	0.3208	0.2811	0.353367		0.5531	0.3184	0.2913	0.3876		-0.25508	-0.08438	-0.03738	-0.125613		-32.408
zenia insignis	1.006	0.9181	1.006	0.9767	CK5	1.698	1.443	0.9633	1.3681		1.711	1.4137	1.1174	1.414		-0.705	-0.4956	-0.1114	-0.4373		-30.9264
	1.035	0.9651	0.9854	0.995167		1.77	1.347	1.047	1.388		1.711	1.4137	1.1174	1.414		-0.676	-0.4486	-0.132	-0.418833		-29.6205
	1.15	1.017	0.9957	1.05423		1.665	1.451	1.342	1.486		1.711	1.4137	1.1174	1.414		-0.561	-0.3967	-0.1217	-0.359767		-25.4432
juglans regia-crop	0.39052	0.33122	0.28832	0.336687	CK6	0.72972	0.60732	0.36002	0.565687		0.7063	0.6529	0.5456	0.6349		-0.31578	-0.32168	-0.25728	-0.298213		-46.9701
	0.52382	0.38982	0.33842	0.417353		0.67652	0.63102	0.58562	0.631053		0.7063	0.6529	0.5456	0.6349		-0.18248	-0.26308	-0.20718	-0.217547		-34.2647
	0.44672	0.42182	0.34512	0.404553		0.71252	0.72022	0.69112	0.707953		0.7063	0.6529	0.5456	0.6349		-0.25958	-0.23108	-0.20048	-0.230347		-36.2808
toona sinensis-napier grass	1.199	1.103	0.938	1.08	CK7	1.147	1.016	0.8775	1.0135		1.1943	0.999	1.0737	1.089		0.0047	0.104	-0.1357	-0.009		-0.826446
	1.075	0.947	0.9203	0.980767		1.254	0.9259	0.8365	1.00547		1.1943	0.999	1.0737	1.089		-0.1193	-0.052	-0.1534	-0.108233		-9.93878
	1.03	0.8509	0.8659	0.9156		1.182	1.055	1.507	1.248		1.1943	0.999	1.0737	1.089		-0.1643	-0.1481	-0.2078	-0.1734		-15.9229

## Sheet: TK
sites	0~10	10~20	20~30	0~30	ck	0~10	10~20	20~30	0~30	ck average	0~10	10~20	20~30	0~30	Variation	0~10	10~20	20~30	0~30	variation ratio	0~30
forest reserve	7.452	7.345	8.313	7.70333	CK1	9.843	9.415	10.12	9.79267		3.561	3.46633	3.56933	3.53222		3.891	3.87867	4.74367	4.17111		118.087
	7.539	8.003	8.436	7.99267		10.29	10.15	9.728	10.056		3.561	3.46633	3.56933	3.53222		3.978	4.53667	4.86667	4.46044		126.279
	8.298	8.014	8.19	8.16733		10.01	10.81	10.66	10.4933		3.561	3.46633	3.56933	3.53222		4.737	4.54767	4.62067	4.63511		131.224
natural shrubland	5.952	6.154	6.503	6.203	CK2	5.889	7.349	8.514	7.25067		5.953	6.81533	7.27967	6.68267		-0.001	-0.661333	-0.776667	-0.479667		-7.17777
	7.18	6.396	6.28	6.61867		6.447	7.232	7.253	6.97733		5.953	6.81533	7.27967	6.68267		1.227	-0.419333	-0.999667	-0.064		-0.957702
	6.882	7.693	6.662	7.079		5.523	5.865	6.072	5.82		5.953	6.81533	7.27967	6.68267		0.929	0.877667	-0.617667	0.396333		5.93077
eucalyptus	10.732	12.292	13.832	12.2853	CK3	19.262	17.462	14.072	16.932		19.262	17.462	14.072	16.932		-8.53	-5.17	-0.24	-4.64667		-27.4431
	16.35	16.7	17.34	16.7967		19.262	17.462	14.072	16.932		19.262	17.462	14.072	16.932		-2.912	-0.762	3.268	-0.135333		-0.799276
	15.13	16.44	15.73	15.7667		19.262	17.462	14.072	16.932		19.262	17.462	14.072	16.932		-4.132	-1.022	1.658	-1.16533		-6.88243
	17.15	18.28	15.45	16.96		19.262	17.462	14.072	16.932		19.262	17.462	14.072	16.932		-2.112	0.818	1.378	0.028		0.165367
plum	11.972	10.272	12.542	11.5953	CK4	15.162	16.902	17.722	16.5953		15.9133	17.9647	19.6313	17.8364		-3.94133	-7.69267	-7.08933	-6.24111		-34.9908
	10.572	11.322	8.966	10.2867		16.642	19.246	19.936	18.608		15.9133	17.9647	19.6313	17.8364		-5.34133	-6.64267	-10.6653	-7.54978		-42.3278
	11.352	11.112	15.442	12.6353		15.936	17.746	21.236	18.306		15.9133	17.9647	19.6313	17.8364		-4.56133	-6.85267	-4.18933	-5.20111		-29.16
zenia insignis	1.701	1.727	2.061	1.82967	CK5	3.613	3.458	3.627	3.566		3.561	3.46633	3.56933	3.53222		-1.86	-1.73933	-1.50833	-1.70256		-48.2007
	2.016	1.816	1.813	1.88167		3.548	3.461	3.656	3.555		3.561	3.46633	3.56933	3.53222		-1.545	-1.65033	-1.75633	-1.65056		-46.7285
	2.234	1.819	1.937	1.99667		3.522	3.48	3.425	3.47567		3.561	3.46633	3.56933	3.53222		-1.327	-1.64733	-1.63233	-1.53556		-43.4728
juglans regia-crop	2.761	3.074	3.995	3.27667	CK6	21.802	23.792	30.492	25.362		20.202	21.1353	24.812	22.0498		-17.441	-18.0613	-20.817	-18.7731		-85.1397
	2.905	2.755	2.914	2.858		20.632	20.192	23.802	21.542		20.202	21.1353	24.812	22.0498		-17.297	-18.3803	-21.898	-19.1918		-87.0384
	2.972	3.332	2.65	2.98467		18.172	19.422	20.142	19.2453		20.202	21.1353	24.812	22.0498		-17.23	-17.8033	-22.162	-19.0651		-86.464
toona sinensis-napier grass	8.445	8.319	7.989	8.251	CK7	9.843	9.415	10.12	9.79267		10.0477	10.125	10.1693	10.114		-1.60267	-1.806	-2.18033	-1.863		-18.42
	8.163	8.248	7.925	8.112		10.29	10.15	9.728	10.056		10.0477	10.125	10.1693	10.114		-1.88467	-1.877	-2.24433	-2.002		-19.7943
	7.93	8.023	8.409	8.12067		10.01	10.81	10.66	10.4933		10.0477	10.125	10.1693	10.114		-2.11767	-2.102	-1.76033	-1.99333		-19.7087

## Sheet: AP
sites	0~10	10~20	20~30	0~30	ck	0~10	10~20	20~30	0~30	ck average	0~10	10~20	20~30	0~30	Variation	0~10	10~20	20~30	0~30	variation ratio	0~30
forest reserve	7.4823	13.892	16.455	12.6098	CK1	64.633	26.57	7.872	33.025		56.9087	27.1857	10.4618	31.5187		-49.4264	-13.2937	5.99317	-18.909		-59.9928
	21.536	18.189	15.513	18.4127		57.097	23.944	9.4955	30.1788		56.9087	27.1857	10.4618	31.5187		-35.3727	-8.9967	5.05117	-13.1061		-41.5818
	16.156	14.689	17.397	16.0807		48.996	31.043	14.018	31.3523		56.9087	27.1857	10.4618	31.5187		-40.7527	-12.4967	6.93517	-15.4381		-48.9806
natural shrubland	19.874	14.019	21.33	18.4077	CK2	44.14	28.324	22.717	31.727		42.4477	29.4123	21.475	31.1117		-22.5737	-15.3933	-0.145	-12.704		-40.8336
	17.336	17.787	26.497	20.54		43.981	27.021	18.445	29.8157		42.4477	29.4123	21.475	31.1117		-25.1117	-11.6253	5.022	-10.5717		-33.9798
	18.383	19.065	15.757	17.735		39.222	32.892	23.263	31.7923		42.4477	29.4123	21.475	31.1117		-24.0647	-10.3473	-5.718	-13.3767		-42.9957
eucalyptus	11.869	6.6678	4.8342	7.79033	CK3	13.65	9.029	13.375	12.018		13.65	9.029	13.375	12.018		-1.781	-2.3612	-8.5408	-4.22767		-35.1778
	20.2	17.402	14.662	17.4213		13.65	9.029	13.375	12.018		13.65	9.029	13.375	12.018		6.55	8.373	1.287	5.40333		44.9603
	18.143	12.96	12.733	14.612		13.65	9.029	13.375	12.018		13.65	9.029	13.375	12.018		4.493	3.931	-0.642	2.594		21.5843
	17.476	7.7412	15.382	13.5331		13.65	9.029	13.375	12.018		13.65	9.029	13.375	12.018		3.826	-1.2878	2.007	1.51507		12.6066
plum	10.148	6.3547	3.8926	6.79843	CK4	6.2836	4.4911	4.5082	5.0943		27.9122	6.845	4.71883	13.1587		-17.7642	-0.4903	-0.826233	-6.36026		-48.335
	11.264	10.471	8.1037	9.94623		61.915	8.7823	4.9178	25.205		27.9122	6.845	4.71883	13.1587		-16.6482	3.626	3.38487	-3.21246		-24.4132
	11.832	6.9397	5.1983	7.99		15.538	7.2617	4.7305	9.17673		27.9122	6.845	4.71883	13.1587		-16.0802	0.0947	0.479467	-5.16869		-39.2797
zenia insignis	16.424	12.97	10.233	13.209	CK5	64.633	26.57	7.872	33.025		56.9087	27.1857	10.4618	31.5187		-40.4847	-14.2157	-0.228833	-18.3097		-58.0916
	18.513	13.935	14.054	15.5007		57.097	23.944	9.4955	30.1788		56.9087	27.1857	10.4618	31.5187		-38.3957	-13.2507	3.59217	-16.0181		-50.8208
	27.085	16.099	12.1435	18.4425		48.996	31.043	14.018	31.3523		56.9087	27.1857	10.4618	31.5187		-29.8237	-11.0867	1.68167	-13.0762		-41.4872
juglans regia-crop	14.778	11.037	6.8009	10.872	CK6	18.508	5.8839	3.3243	9.23873		17.105	9.727	5.48613	10.7727		-2.327	1.31	1.31477	0.0992667		0.921465
	26.188	11.931	11.588	16.569		15.074	11.8	5.4621	10.7787		17.105	9.727	5.48613	10.7727		9.083	2.204	6.10187	5.7963		53.8055
	19.627	14.536	12.191	15.4513		17.733	11.497	7.672	12.3007		17.105	9.727	5.48613	10.7727		2.522	4.809	6.70487	4.67863		43.4305
toona sinensis-napier grass	27.424	14.041	14.948	18.8043	CK7	27.958	21.298	14.497	21.251		33.0793	21.846	14.797	23.2408		-5.6553	-7.805	0.151	-4.43644		-19.0891
	27.377	18.968	16.147	20.8307		34.727	17.649	13.964	22.1133		33.0793	21.846	14.797	23.2408		-5.7023	-2.878	1.35	-2.41011		-10.3702
	18.615	13.081	12.451	14.7157		36.553	26.591	15.93	26.358		33.0793	21.846	14.797	23.2408		-14.4643	-8.765	-2.346	-8.52511		-36.6817

## Sheet: AK
sites	0~10	10~20	20~30	0~30	ck	0~10	10~20	20~30	0~30	ck average	0~10	10~20	20~30	0~30	Variation	0~10	10~20	20~30	0~30	variation ratio	0~30
forest reserve	65.127	73.303	64.4535	67.6278	CK1	142.91	63.533	37.814	81.419		109.718	66.6613	44.527	73.6353		-44.5907	6.6417	19.9265	-6.0075		-8.15845
	85.59	63.377	67.095	72.0207		91.471	59.333	42.314	64.3727		109.718	66.6613	44.527	73.6353		-24.1277	-3.2843	22.568	-1.61467		-2.19279
	99.401	78.193	61.812	79.802		94.772	77.118	53.453	75.1143		109.718	66.6613	44.527	73.6353		-10.3167	11.5317	17.285	6.16667		8.3746
natural shrubland	52.361	35.33	36.974	41.555	CK2	55.349	36.854	28.462	40.2217		52.945	35.8187	35.4987	41.4208		-0.584	-0.4887	1.47533	0.134222		0.324046
	28.339	29.156	46.125	34.54		47.757	34.503	35.111	39.1237		52.945	35.8187	35.4987	41.4208		-24.606	-6.6627	10.6263	-6.88078		-16.6119
	30.204	31.093	30.667	30.6547		55.729	36.099	42.923	44.917		52.945	35.8187	35.4987	41.4208		-22.741	-4.7257	-4.83167	-10.7661		-25.9921
eucalyptus	70.794	47.268	46.953	55.005	CK3	112.29	67.355	62.444	80.6963		112.29	67.355	62.444	80.6963		-41.496	-20.087	-15.491	-25.6913		-31.8371
	141.8	71.673	55.814	89.7623		112.29	67.355	62.444	80.6963		112.29	67.355	62.444	80.6963		29.51	4.318	-6.63	9.066		11.2347
	79.007	50.969	39.331	56.4357		112.29	67.355	62.444	80.6963		112.29	67.355	62.444	80.6963		-33.283	-16.386	-23.113	-24.2607		-30.0641
	140.27	64.78	38.785	81.2783		112.29	67.355	62.444	80.6963		112.29	67.355	62.444	80.6963		27.98	-2.575	-23.659	0.582		0.721222
plum	81.184	41.044	49.671	57.2997	CK4	64.796	44.785	46.989	52.19		71.726	45.5403	47.3873	54.8846		9.458	-4.4963	2.28367	2.41511		4.40035
	129.61	62.686	52.194	81.4967		64.796	44.785	46.989	52.19		71.726	45.5403	47.3873	54.8846		57.884	17.1457	4.80667	26.6121		48.4874
	132.62	69.114	56.337	86.0237		85.586	47.051	48.184	60.2737		71.726	45.5403	47.3873	54.8846		60.894	23.5737	8.94967	31.1391		56.7357
zenia insignis	44.97	41.359	33.644	39.991	CK5	142.91	63.533	37.814	81.419		109.718	66.6613	44.527	73.6353		-64.7477	-25.3023	-10.883	-33.6443		-45.6905
	78.099	48.873	36.534	54.502		91.471	59.333	42.314	64.3727		109.718	66.6613	44.527	73.6353		-31.6187	-17.7883	-7.993	-19.1333		-25.9839
	119.77	62.171	35.089	72.3433		94.772	77.118	53.453	75.1143		109.718	66.6613	44.527	73.6353		10.0523	-4.4903	-9.438	-1.292		-1.75459
juglans regia-crop	44.552	30.057	24.321	32.9767	CK6	98.022	43.334	42.189	61.1817		92.6683	56.52	47.9207	65.703		-48.1163	-26.463	-23.5997	-32.7263		-49.8095
	39.009	25.259	25.673	29.9803		63.233	57.554	52.67	57.819		92.6683	56.52	47.9207	65.703		-53.6593	-31.261	-22.2477	-35.7227		-54.3699
	42.507	30.033	21.899	31.4797		116.75	68.672	48.903	78.1083		92.6683	56.52	47.9207	65.703		-50.1613	-26.487	-26.0217	-34.2233		-52.0879
toona sinensis-napier grass	89.892	50.03	48.437	62.7863	CK7	65.813	49.234	61.298	58.7817		126.901	61.6673	61.2093	83.2592		-37.009	-11.6373	-12.7723	-20.4729		-24.5893
	95.549	57.265	58.451	70.4217		173.09	64.095	66.516	101.234		126.901	61.6673	61.2093	83.2592		-31.352	-4.4023	-2.75833	-12.8376		-15.4188
	66.251	48.249	43.5	52.6667		141.8	71.673	55.814	89.7623		126.901	61.6673	61.2093	83.2592		-60.65	-13.4183	-17.7093	-30.5926		-36.7437

## Sheet: NH4
sites	0~10	10~20	20~30	0~30	ck	0~10	10~20	20~30	0~30	ck average	0~10	10~20	20~30	0~30	Variation	0~10	10~20	20~30	0~30	variation ratio	0~30
forest reserve	6.5738	14.7885	11.6052	10.9892	CK1	6.73998	5.62271	6.38915	6.25061		6.495	5.6003	6.239	6.11143		0.0788025	9.18816	5.36624	4.87773		79.8133
	11.8403	9.16098	9.019	10.0068		6.86416	5.27648	6.37523	6.17196		6.495	5.6003	6.239	6.11143		5.34531	3.56068	2.78	3.89533		63.7384
	15.0341	9.96172	6.433	10.4763		5.88149	5.90233	5.95308	5.9123		6.495	5.6003	6.239	6.11143		8.53908	4.36142	0.194	4.36483		71.4208
natural shrubland	5.67804	5.69149	4.89141	5.42032	CK2	4.63277	5.1955	3.4173	4.41519		5.3557	5.4627	3.7883	4.8689		0.322344	0.228789	1.10311	0.551415		11.3252
	4.69052	4.77055	4.47318	4.64475		5.48176	4.89662	5.04253	5.1403		5.3557	5.4627	3.7883	4.8689		-0.665178	-0.692146	0.68488	-0.224148		-4.60366
	5.21632	4.23226	4.46911	4.63923		5.95238	6.29451	2.90516	5.05068		5.3557	5.4627	3.7883	4.8689		-0.139377	-1.23044	0.680812	-0.229667		-4.71702
eucalyptus	5.10678	5.40394	5.24906	5.25326	CK3	2.06107	2.47879	2.36269	2.30085		2.0611	2.4788	2.3628	2.3009		3.04568	2.92514	2.88626	2.95236		128.313
	15.6958	11.0904	14.003	13.5964		2.06107	2.47879	2.36269	2.30085		2.0611	2.4788	2.3628	2.3009		13.6347	8.61157	11.6402	11.2955		490.916
	9.43193	16.2023	12.0606	12.5649		2.06107	2.47879	2.36269	2.30085		2.0611	2.4788	2.3628	2.3009		7.37083	13.7235	9.69778	10.264		446.088
	11.2902	7.66441	8.54305	9.16587		2.06107	2.47879	2.36269	2.30085		2.0611	2.4788	2.3628	2.3009		9.22907	5.18561	6.18025	6.86497		298.36
plum	4.0029	3.35577	3.24675	3.53514	CK4	6.11165	3.99535	5.11278	5.07326		6.7427	5.9187	5.223	5.96147		-2.7398	-2.56293	-1.97625	-2.42632		-40.7001
	4.135	3.47015	2.75248	3.45254		8.08728	6.61597	4.92263	6.54196		6.7427	5.9187	5.223	5.96147		-2.6077	-2.44855	-2.47052	-2.50893		-42.0857
	4.4186	3.47531	4.25631	4.05008		6.02868	7.14496	5.63267	6.26877		6.7427	5.9187	5.223	5.96147		-2.3241	-2.44339	-0.966686	-1.91139		-32.0624
zenia insignis	8.54207	9.08309	9.40057	9.00858	CK5	6.73998	5.62271	6.38915	6.25061		6.495	5.6003	6.239	6.11143		2.04707	3.48279	3.16157	2.89714		47.4053
	11.2194	9.00774	9.05497	9.7607		6.86416	5.27648	6.37523	6.17196		6.495	5.6003	6.239	6.11143		4.72439	3.40744	2.81597	3.64927		59.7121
	14.5048	7.59065	9.228	10.4411		5.88149	5.90233	5.95308	5.9123		6.495	5.6003	6.239	6.11143		8.00976	1.99035	2.989	4.3297		70.846
juglans regia-crop	5.1272	4.87427	3.8621	4.62119	CK6	6.80902	6.50896	4.32473	5.8809		5.6603	5.8653	4.311	5.27887		-0.533098	-0.991025	-0.448898	-0.657674		-12.4586
	4.79065	3.69626	4.96128	4.48273		4.72468	5.30888	4.99025	5.00794		5.6603	5.8653	4.311	5.27887		-0.869648	-2.16904	0.650278	-0.796136		-15.0816
	3.72898	4.09889	4.0502	3.95936		5.44659	5.77778	3.61762	4.94733		5.6603	5.8653	4.311	5.27887		-1.93132	-1.76641	-0.260803	-1.31951		-24.9961
toona sinensis-napier grass	10.0682	6.95673	11.4132	9.47938	CK7	12.3268	8.11144	9.88196	10.1067		11.8577	7.2387	9.9703	9.6889		-1.78954	-0.281974	1.44295	-0.209523		-2.1625
	10.9078	12.021	11.9614	11.63		12.9907	8.4427	9.75666	10.3967		11.8577	7.2387	9.9703	9.6889		-0.949905	4.78226	1.99105	1.94114		20.0346
	6.61833	5.44626	8.70864	6.92441		10.2553	5.16234	10.2725	8.56338		11.8577	7.2387	9.9703	9.6889		-5.23937	-1.79244	-1.26166	-2.76449		-28.5325

## Sheet: NO3
sites	0~10	10~20	20~30	0~30	ck	0~10	10~20	20~30	0~30	ck average	0~10	10~20	20~30	0~30	Variation	0~10	10~20	20~30	0~30	variation ratio	0~30
forest reserve	2.79081	2.11058	3.5936	2.83166	CK1	22.7615	20.9158	8.4491	17.3754		14.6193	9.6947	5.1053	9.80643		-11.8285	-7.58412	-1.5117	-6.97477		-71.1244
	2.79942	1.61951	2.748	2.38898		13.8198	4.40956	3.33789	7.1891		14.6193	9.6947	5.1053	9.80643		-11.8199	-8.07519	-2.3573	-7.41746		-75.6387
	5.74976	6.90431	1.602	4.75202		7.27718	3.75814	3.52884	4.85472		14.6193	9.6947	5.1053	9.80643		-8.86954	-2.79039	-3.5033	-5.05441		-51.5418
natural shrubland	1.49908	3.3559	1.79171	2.21556	CK2	9.4774	6.80352	4.93346	7.07146		12.416	7.3037	4.7883	8.16933		-10.9169	-3.9478	-2.99659	-5.95377		-72.8795
	1.74565	2.3088	1.42241	1.82562		11.9886	6.56955	5.84121	8.13313		12.416	7.3037	4.7883	8.16933		-10.6704	-4.9949	-3.36589	-6.34371		-77.6528
	2.3353	1.56463	1.68919	1.86304		15.7823	8.53705	3.59116	9.30351		12.416	7.3037	4.7883	8.16933		-10.0807	-5.73907	-3.09911	-6.3063		-77.1947
eucalyptus	7.41876	4.63054	5.45113	5.83348	CK3	4.30344	5.29218	3.8447	4.4801		4.303	5.292	3.845	4.48		3.11576	-0.661458	1.60613	1.35348		30.2115
	11.3618	2.64735	2.69841	5.5692		4.30344	5.29218	3.8447	4.4801		4.303	5.292	3.845	4.48		7.05883	-2.64465	-1.14659	1.0892		24.3124
	7.40451	3.54485	2.92453	4.62463		4.30344	5.29218	3.8447	4.4801		4.303	5.292	3.845	4.48		3.10151	-1.74715	-0.920472	0.144627		3.22828
	3.92892	1.98259	2.52129	2.81093		4.30344	5.29218	3.8447	4.4801		4.303	5.292	3.845	4.48		-0.374081	-3.30941	-1.32371	-1.66907		-37.256
plum	1.97483	2.36058	3.09833	2.47791	CK4	1.69875	1.86512	1.2735	1.61245		4.5477	1.9243	1.4593	2.64377		-2.57287	0.436277	1.63903	-0.165854		-6.2734
	2.505	1.71175	0.717822	1.64486		8.18477	2.5808	1.52321	4.09626		4.5477	1.9243	1.4593	2.64377		-2.0427	-0.212546	-0.741478	-0.998908		-37.7835
	1.50678	1.7425	1.22544	1.49157		3.75865	1.32713	1.58168	2.22249		4.5477	1.9243	1.4593	2.64377		-3.04092	-0.181802	-0.233856	-1.15219		-43.5814
zenia insignis	3.39866	4.88061	3.08754	3.78894	CK5	22.7615	20.9158	8.4491	17.3754		14.6193	9.6947	5.1053	9.80643		-11.2206	-4.81409	-2.01776	-6.0175		-61.3627
	5.72968	4.75799	2.78206	4.42324		13.8198	4.40956	3.33789	7.1891		14.6193	9.6947	5.1053	9.80643		-8.88962	-4.93671	-2.32324	-5.38319		-54.8945
	11.6571	4.14122	2.935	6.24445		7.27718	3.75814	3.52884	4.85472		14.6193	9.6947	5.1053	9.80643		-2.96216	-5.55348	-2.1703	-3.56198		-36.3229
juglans regia-crop	8.2681	14.3085	8.89585	10.4908	CK6	7.01056	4.96514	2.91956	4.96509		4.4187	3.9937	2.469	3.62713		3.8494	10.3148	6.42685	6.86369		189.232
	8.34469	6.44393	5.6728	6.82047		3.6529	3.44595	2.37817	3.159		4.4187	3.9937	2.469	3.62713		3.92599	2.45023	3.2038	3.19334		88.0403
	6.31058	5.97967	3.75984	5.35003		2.59208	3.57005	2.10872	2.75695		4.4187	3.9937	2.469	3.62713		1.89188	1.98597	1.29084	1.7229		47.5003
toona sinensis-napier grass	1.85005	1.74036	4.15578	2.58206	CK7	10.2154	9.79783	8.82436	9.61252		16.2527	9.235	8.393	11.2936		-14.4027	-7.49464	-4.23722	-8.7115		-77.1369
	5.93156	6.22754	5.00966	5.72292		26.6528	11.288	9.23324	15.7247		16.2527	9.235	8.393	11.2936		-10.3211	-3.00746	-3.38334	-5.57064		-49.3258
	1.59963	3.16699	4.31985	3.02882		11.8895	6.61874	7.12237	8.54354		16.2527	9.235	8.393	11.2936		-14.6531	-6.06801	-4.07315	-8.26474		-73.181

## Sheet: pH
sites	0~10	10~20	20~30	0~30	ck	0~10	10~20	20~30	0~30	ck average	0~10	10~20	20~30	0~30	Variation	0~10	10~20	20~30	0~30	variation ratio	0~30
forest reserve	7.86	7.57	7.14	7.52333	CK1	7.52	7.64	7.73	7.63		7.59	7.70667	7.78667	7.69444		0.27	-0.136667	-0.646667	-0.171111
	7.3	7.23	7.16	7.23		7.58	7.74	7.8	7.70667		7.59	7.70667	7.78667	7.69444		-0.29	-0.476667	-0.626667	-0.464444
	7.13	7.16	7.12	7.13667		7.67	7.74	7.83	7.74667		7.59	7.70667	7.78667	7.69444		-0.46	-0.546667	-0.666667	-0.557778
natural shrubland	6.6	6.95	6.55	6.7	CK2	7.47	7.58	7.61	7.55333		7.03	7.19667	7.25	7.15889		-0.43	-0.246667	-0.7	-0.458889
	6.6	6.68	6.68	6.65333		6.73	7.05	7.08	6.95333		7.03	7.19667	7.25	7.15889		-0.43	-0.516667	-0.57	-0.505556
	6.77	6.64	6.72	6.71		6.89	6.96	7.06	6.97		7.03	7.19667	7.25	7.15889		-0.26	-0.556667	-0.53	-0.448889
eucalyptus	5.69	5.54	5.6	5.61	CK3	7.85	7.92	7.97	7.91333		7.85	7.92	7.97	7.91333		-2.16	-2.38	-2.37	-2.30333
	6.09	5.23	4.89	5.40333		7.85	7.92	7.97	7.91333		7.85	7.92	7.97	7.91333		-1.76	-2.69	-3.08	-2.51
	5.86	5.17	4.82	5.28333		7.85	7.92	7.97	7.91333		7.85	7.92	7.97	7.91333		-1.99	-2.75	-3.15	-2.63
	5.7	5.12	4.89	5.23667		7.85	7.92	7.97	7.91333		7.85	7.92	7.97	7.91333		-2.15	-2.8	-3.08	-2.67667
plum	6.68	6.64	5.9	6.40667	CK4	5.02	5.02	5.29	5.11		5.38667	5.03667	5.27	5.23111		1.29333	1.60333	0.63	1.17556
	6.04	5.83	5.48	5.78333		5.78	5.05	5.26	5.36333		5.38667	5.03667	5.27	5.23111		0.653333	0.793333	0.21	0.552222
	5.78	5.71	5.61	5.7		5.36	5.04	5.26	5.22		5.38667	5.03667	5.27	5.23111		0.393333	0.673333	0.34	0.468889
zenia insignis	6.97	7.03	7.15	7.05	CK5	7.52	7.64	7.73	7.63		7.59	7.70667	7.78667	7.69444		-0.62	-0.676667	-0.636667	-0.644444
	7.58	7.6	7.64	7.60667		7.58	7.74	7.8	7.70667		7.59	7.70667	7.78667	7.69444		-0.01	-0.106667	-0.146667	-0.0877778
	7.64	7.66	7.33	7.54333		7.67	7.74	7.83	7.74667		7.59	7.70667	7.78667	7.69444		0.05	-0.0466667	-0.456667	-0.151111
juglans regia-crop	7.12	6.82	6.93	6.95667	CK6	5.24	5.65	6.06	5.65		5.36667	5.56333	5.98	5.63667		1.75333	1.25667	0.95	1.32
	6.22	6.25	6.34	6.27		5.4	5.57	5.89	5.62		5.36667	5.56333	5.98	5.63667		0.853333	0.686667	0.36	0.633333
	6.08	6.09	6.24	6.13667		5.46	5.47	5.99	5.64		5.36667	5.56333	5.98	5.63667		0.713333	0.526667	0.26	0.5
toona sinensis-napier grass	7.01	7.11	7.14	7.08667	CK7	5.61	5.72	6.13	5.82		6.08667	6.02667	6.30667	6.14		0.923333	1.08333	0.833333	0.946667
	6.99	7.03	7.01	7.01		6.45	6.44	6.52	6.47		6.08667	6.02667	6.30667	6.14		0.903333	1.00333	0.703333	0.87
	6.97	7.04	7.06	7.02333		6.2	5.92	6.27	6.13		6.08667	6.02667	6.30667	6.14		0.883333	1.01333	0.753333	0.883333

[truncated: 2 more sheets: texture, SQI]
